# Supplementary material for: Differential Localization of Structural and Non-Structural Proteins during the Bluetongue Virus Replication Cycle
Source: MDPI journal article supplement (doi:10.3390/v12030343), 2020-03-20
Supplement: s1 [file s1]

**Figure. S1**

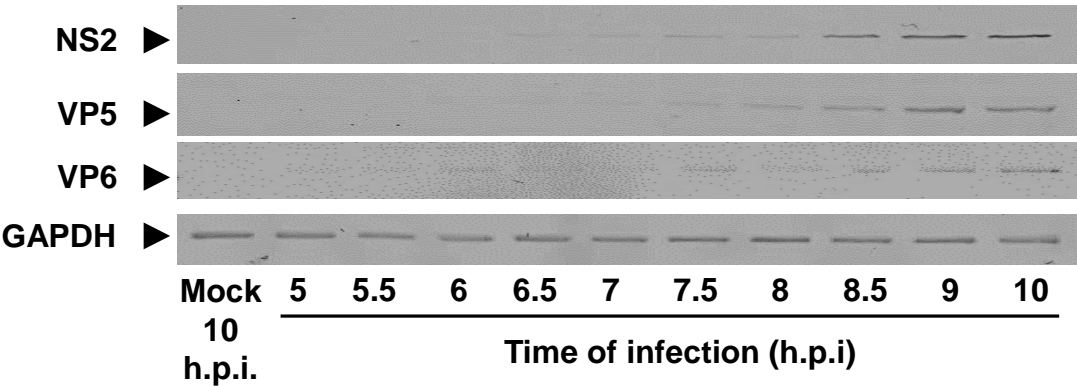

**Figure. S1** Western Blot detection of the expression of the viral proteins NS2, VP5, VP6 and host cell GAPDH from 5 to 10 hours post infection (h.p.i). BSR cells were infected with BTV1 at MOI 5.
