# Supplementary material for: Differential Localization of Structural and Non-Structural Proteins during the Bluetongue Virus Replication Cycle
Source: Viruses. 2020 Mar 20;12(3):343. doi: 10.3390/v12030343 (PMC7150864; doi:10.3390/v12030343)
Supplement: Supplementary file 1 [file viruses-12-00343-s001.zip]

Archive with 4 entries (4 files):
- Supplementary-fig-S1.pdf
- Supplementary-fig-S2.pdf
- video-S1.avi
- video-S2.avi
